# Supplementary material for: No differences in neural responses or performance during a cannabis cue-specific Stop-Signal Task between CUDIT-R-score-stratified cannabis users and non-users: Insights from fNIRS
Source: Research Square preprint supplement (doi:10.21203/rs.3.rs-7582103/v1), 2025-09-15
Supplement: Supplementary file 1 [file bedc4e559afe37a8e84fb78b.docx]

**Appendix A - Expanded Methods and Data Processing**

**Stop-Signal Task (Verbruggen & Logan, 2009)**

The Stop-Signal Task (SST) was designed to measure response inhibition, specifically the ability to cancel an initiated response. The paradigm was adapted from Verbruggen and Logan (2009) using a cannabis cue stimulus set (Macatee et al., 2021).

**Task Structure**

The task consisted of three segments:

- **Practice Block**: 10 trials (6 go, 4 stop) to familiarise participants with the task and response mappings.
- **Priming Block**: 20 go-only trials intended to build a dominant prepotent response.
- **Experimental Block**: 200 total trials split into 10 blocks of 20 trials each. Each block contained 15 go trials and 5 stop-signal trials presented in randomized order. Ten-second baseline periods occurred between blocks, during which participants viewed instructions and awaited a keypress to proceed.

**Trial Procedure**

Each trial began with a 500 ms fixation cross.

A cannabis-related image (portrait or landscape orientation) was then displayed. Participants responded with:

- ‘D’ key for portrait images
- ‘K’ key for landscape images

On 25% of trials (stop trials), a red ‘=’ symbol appeared shortly after image onset, indicating that participants should inhibit their response.

Stimuli were presented for 1500 ms, and responses were recorded within this window.

**Staircase Tracking and SSD Parameters**

The stop-signal delay (SSD) - the time between stimulus onset and the presentation of the stop signal - was dynamically adjusted using a 1-up, 1-down staircase implemented with PsychoPy’s StairHandler. This adaptive method sought to maintain a 50% successful inhibition rate and operated with the following parameters:

- **Initial SSD**: 250 ms
- **Step Size**: 50 ms initially, reducing to 5 ms across the staircase progression
- **SSD Range**: Minimum 50 ms, Maximum 1150 ms
- **Adjustment Rule**:
- **Successful inhibition**: SSD increased
- **Failed inhibition**: SSD decreased

SSD values were updated trial-by-trial using performance data from stop trials and adjusted linearly.

This refined staircase approach allowed greater precision than traditional fixed-step methods and was implemented per trial rather than in blocks.

**Response Accuracy and Feedback**

- Correct go responses and successful inhibitions were silently acknowledged.
- Incorrect go responses or failed inhibitions were followed by brief (250 ms) visual feedback: a red cross image.
- Trials with early responses were controlled for, and keypresses were cleared prior to each stimulus to avoid contamination.

**Outcome Measures**

The primary dependent variable was Stop Signal Reaction Time (SSRT), estimated using the integration method (Verbruggen et al., 2019). This method calculates the time required to inhibit a response by integrating the distribution of go reaction times and subtracting the average SSD. Higher SSRT values indicate poorer inhibitory control.

Data from the practice and priming blocks were excluded from analysis. The total duration of the task was approximately 10 minutes.

**Pre-screening Eligibility Questions**

1. Do you confirm that you have read the information sheet and consent form, are 18 years of age or older, and eligible to take part in the study, and consent to complete the pre-screening survey?
2. Which of the following applies to you?

- I have NEVER used cannabis (or have done so fewer than 5 times)
- I HAVE USED CANNABIS at least once a month (on average) for the last 6 months
- Neither of the above

*Note:* Participants selecting the first option were assigned to the control group; those selecting the second completed the CUDIT-R and were stratified based on scores. Participants selecting the third option or scoring between 9 and 11 on the CUDIT-R were excluded.

**fNIRS Data Analysis: Pre-Processing**

Preprocessing was using Homer3, an open-source software package (Huppert et al., 2009), implemented in MATLAB (The Mathworks Inc., 2022). The raw NIRS signal was initially transformed into optical density. Channels were then pruned using a signal-to-noise ratio (SNR) threshold of 12.5, with intensity and standard deviation bounds set to eliminate channels with a data range exceeding 0 to 1 × 10⁵ or a standard deviation outside the range 0–45.

Motion artefact detection was based on a combined amplitude and standard deviation thresholding approach, with artefacts flagged when changes exceeded a standard deviation threshold of 10 or an amplitude threshold of 0.5, within a 0.5-second window. A 1.0-second mask was applied around detected artefacts. Wavelet-based motion correction was subsequently applied with an interquartile range (IQR) threshold of 1.5.

A high-pass filter with a cut-off of 0.01 Hz was used to eliminate baseline drift and low-frequency oscillations, and a low-pass filter at 0.5 Hz was applied to remove physiological and high-frequency noise. The Modified Beer–Lambert Law was then used to calculate concentration values of oxygenated (oxyHb) and deoxygenated haemoglobin (deoxyHb), using participant-specific, age-adjusted partial pathlength factors (PPF) for the two wavelengths (780 nm and 850 nm, respectively), as a proxy for differential pathlength factors (DPF; Scholkmann & Wolf, 2013).

Task-evoked haemodynamic responses were extracted using a block-averaging approach, with a time window spanning −5.0 to 28.0 seconds relative to stimulus onset. Visual inspection was performed to confirm the effectiveness of all filtering and correction steps. Participant data were excluded from analyses for individual tasks if fewer than 60% (i.e., <11) of their 18 functional channels were usable following pre-processing. This criterion did not result in the exclusion of any participants.

**Appendix B: ANOVA Summaries and Supplementary analyses**

**Main Analysis**

**Table B1**

*fNIRS ANOVA Results for the Stop-Signal Task (OxyHb; 5–20 s HRF Extraction Window)*

| Channel | SS | df | F | p | Levene's Sig | ηp² |
| --- | --- | --- | --- | --- | --- | --- |
| 1,1 | 0.036 | 2,78 | 0.444 | .643 | .961 | 0.010 |
| 1,2 | 0.035 | 2,77 | 0.357 | .701 | .820 | 0.010 |
| 1,4 | 0.026 | 2,75 | 0.242 | .786 | .130 | 0.000 |
| 2,2 | 0.028 | 2,68 | 0.484 | .619 | .065 | 0.000 |
| 2,3 | 0.035 | 2,77 | 0.486 | .617 | .202 | 0.000 |
| 2,5 | 0.083 | 2,68 | 0.566 | .570 | .246 | 0.020 |
| 3,1 | 0.036 | 2,77 | 0.345 | .709 | .860 | 0.010 |
| 3,4 | 0.005 | 2,77 | 0.056 | .946 | .653 | 0.020 |
| 4,2 | 0.004 | 2,74 | 0.040 | .961 | .650 | 0.000 |
| 4,4 | 0.013 | 2,77 | 0.152 | .859 | .693 | 0.000 |
| 4,5 | 0.029 | 2,77 | 0.368 | .693 | .863 | 0.050 |
| 4,6 | 0.004 | 2,74 | 0.047 | .954 | .684 | 0.000 |
| 5,3 | 0.011 | 2,74 | 0.151 | .860 | .347 | 0.010 |
| 5,5 | 0.098 | 2,77 | 0.677 | .511 | .354 | 0.010 |
| 6,4 | 0.005 | 2,78 | 0.098 | .906 | .481 | 0.000 |
| 6,6 | 0.049 | 2,75 | 0.741 | .480 | .405 | 0.000 |
| 7,5 | 0.017 | 2,75 | 0.249 | .780 | .393 | 0.020 |
| 7,6 | 0.017 | 2,67 | 0.153 | .858 | .455 | 0.010 |

**Table B2**

*fNIRS ANOVA Results for the Stop-Signal Task (DeoxyHb; 5–20 s HRF Extraction Window)*

| Channel | SS (Between) | df (Between) | F | p | Levene's Sig | ηp² |
| --- | --- | --- | --- | --- | --- | --- |
| 1,1 | 0.000 | 2,78 | 0.038 | .963 | .685 | 0.000 |
| 1,2 | 0.001 | 2,77 | 0.101 | .904 | .203 | 0.000 |
| 1,4 | 0.003 | 2,75 | 0.490 | .614 | .266 | 0.010 |
| 2,2 | 0.000 | 2,68 | 0.020 | .980 | .103 | 0.000 |
| 2,3 | 0.002 | 2,77 | 0.127 | .881 | .630 | 0.000 |
| 2,5 | 0.001 | 2,68 | 0.054 | .947 | .603 | 0.000 |
| 3,1 | 0.018 | 2,77 | 0.911 | .406 | .560 | 0.010 |
| 3,4 | 0.004 | 2,77 | 0.445 | .642 | .460 | 0.000 |
| 4,2 | 0.001 | 2,74 | 0.075 | .927 | .437 | 0.000 |
| 4,4 | 0.006 | 2,77 | 0.643 | .528 | .726 | 0.000 |
| 4,5 | 0.018 | 2,77 | 2.162 | .122 | .127 | 0.000 |
| 4,6 | 0.004 | 2,74 | 0.422 | .657 | .667 | 0.000 |
| 5,3 | 0.009 | 2,74 | 0.599 | .552 | .405 | 0.000 |
| 5,5 | 0.006 | 2,77 | 0.274 | .761 | .894 | 0.000 |
| 6,4 | 0.000 | 2,78 | 0.101 | .904 | .763 | 0.000 |
| 6,6 | 0.020 | 2,75 | 2.769 | .069 | .425 | 0.010 |
| 7,5 | 0.004 | 2,75 | 1.081 | .344 | .491 | 0.010 |
| 7,6 | 0.018 | 2,67 | 1.131 | .329 | .178 | 0.010 |

**Supplementary Analyses of alternative HRF extraction windows.**

The following tables present full ANOVA outputs for supplementary analyses using alternative HRF extraction windows (0–20 s and 0–25 s), and for the first five blocks of the task (using the same 5–20 s window), to support the robustness and interpretability of the main findings. In addition to the neuroimaging data, behavioural analyses were also conducted on the first five blocks to assess whether early task performance varied between groups prior to the emergence of universal disengagement effects.

**Table B3**

*fNIRS ANOVA Results for the Stop-Signal Task (OxyHb; 0–20 s HRF Extraction Window)*

| Channel | SS | df | F | p | Levene's Sig | ηp² |
| --- | --- | --- | --- | --- | --- | --- |
| 1,1 | 0.02 | 2,78 | 0.30 | 0.742 | 0.957 | 0.007 |
| 1,2 | 0.02 | 2,77 | 0.23 | 0.797 | 0.882 | 0.006 |
| 1,4 | 0.03 | 2,75 | 0.33 | 0.719 | 0.197 | 0.006 |
| 2,2 | 0.05 | 2,68 | 0.20 | 0.821 | 0.206 | 0.006 |
| 2,3 | 0.04 | 2,77 | 0.33 | 0.721 | 0.959 | 0.008 |
| 2,5 | 0.10 | 2,68 | 0.81 | 0.451 | 0.290 | 0.019 |
| 3,1 | 0.03 | 2,77 | 0.32 | 0.731 | 0.749 | 0.005 |
| 3,4 | 0.00 | 2,77 | 0.06 | 0.941 | 0.882 | 0.003 |
| 4,2 | 0.01 | 2,74 | 0.07 | 0.931 | 0.414 | 0.001 |
| 4,4 | 0.01 | 2,77 | 0.13 | 0.881 | 0.740 | 0.003 |
| 4,5 | 0.01 | 2,77 | 0.18 | 0.834 | 0.423 | 0.006 |
| 4,6 | 0.01 | 2,74 | 0.18 | 0.832 | 0.924 | 0.005 |
| 5,3 | 0.01 | 2,74 | 0.20 | 0.821 | 0.921 | 0.004 |
| 5,5 | 0.07 | 2,77 | 0.64 | 0.531 | 0.801 | 0.017 |
| 6,4 | 0.00 | 2,78 | 0.08 | 0.923 | 0.932 | 0.003 |
| 6,6 | 0.04 | 2,75 | 0.76 | 0.470 | 0.734 | 0.023 |
| 7,5 | 0.01 | 2,75 | 0.18 | 0.833 | 0.343 | 0.003 |
| 7,6 | 0.01 | 2,67 | 0.12 | 0.884 | 0.509 | 0.004 |

**Table B4**

*fNIRS ANOVA Results for the Stop-Signal Task (DeoxyHb; 0–20 s HRF Extraction Window)*

| Channel | SS | df | F | p | Levene's Sig | ηp² |
| --- | --- | --- | --- | --- | --- | --- |
| 1,1 | 0.01 | 2,78 | 0.54 | 0.588 | 0.331 | 0.014 |
| 1,2 | 0.00 | 2,77 | 0.16 | 0.852 | 0.372 | 0.004 |
| 1,4 | 0.00 | 2,75 | 0.72 | 0.492 | 0.552 | 0.019 |
| 2,2 | 0.01 | 2,68 | 0.37 | 0.691 | 0.039 | 0.011 |
| 2,3 | 0.00 | 2,77 | 0.04 | 0.964 | 0.512 | 0.001 |
| 2,5 | 0.00 | 2,68 | 0.08 | 0.925 | 0.076 | 0.002 |
| 3,1 | 0.02 | 2,77 | 1.16 | 0.318 | 0.364 | 0.029 |
| 3,4 | 0.01 | 2,77 | 0.77 | 0.469 | 0.498 | 0.019 |
| 4,2 | 0.00 | 2,74 | 0.18 | 0.839 | 0.476 | 0.005 |
| 4,4 | 0.00 | 2,77 | 0.57 | 0.569 | 0.996 | 0.015 |
| 4,5 | 0.01 | 2,77 | 1.93 | 0.153 | 0.077 | 0.048 |
| 4,6 | 0.01 | 2,74 | 0.84 | 0.434 | 0.228 | 0.022 |
| 5,3 | 0.01 | 2,74 | 0.45 | 0.637 | 0.250 | 0.012 |
| 5,5 | 0.00 | 2,77 | 0.14 | 0.871 | 0.414 | 0.004 |
| 6,4 | 0.00 | 2,78 | 0.05 | 0.949 | 0.602 | 0.001 |
| 6,6 | 0.02 | 2,75 | 3.61 | 0.032 | 0.222 | 0.088 |
| 7,5 | 0.00 | 2,75 | 0.59 | 0.557 | 0.612 | 0.015 |
| 7,6 | 0.02 | 2,67 | 1.14 | 0.326 | 0.185 | 0.033 |

**Table B5**

*fNIRS ANOVA Results for the Stop-Signal Task (OxyHb; 0–25 s HRF Extraction Window)*

| Channel | SS | df | F | p | Levene's Sig | ηp² |
| --- | --- | --- | --- | --- | --- | --- |
| 1,1 | 0.021 | 2,78 | 0.3 | 0.742 | 0.966 | 0.008 |
| 1,2 | 0.018 | 2,77 | 0.23 | 0.797 | 0.958 | 0.006 |
| 1,4 | 0.028 | 2,75 | 0.33 | 0.719 | 0.2 | 0.009 |
| 2,2 | 0.054 | 2,68 | 0.2 | 0.821 | 0.181 | 0.006 |
| 2,3 | 0.037 | 2,77 | 0.33 | 0.721 | 0.982 | 0.008 |
| 2,5 | 0.096 | 2,68 | 0.81 | 0.451 | 0.362 | 0.023 |
| 3,1 | 0.028 | 2,77 | 0.32 | 0.731 | 0.722 | 0.008 |
| 3,4 | 0.004 | 2,77 | 0.06 | 0.941 | 0.914 | 0.002 |
| 4,2 | 0.006 | 2,74 | 0.07 | 0.931 | 0.46 | 0.002 |
| 4,4 | 0.009 | 2,77 | 0.13 | 0.881 | 0.796 | 0.003 |
| 4,5 | 0.012 | 2,77 | 0.18 | 0.834 | 0.456 | 0.005 |
| 4,6 | 0.014 | 2,74 | 0.19 | 0.832 | 0.918 | 0.005 |
| 5,3 | 0.012 | 2,74 | 0.2 | 0.821 | 0.867 | 0.005 |
| 5,5 | 0.074 | 2,77 | 0.64 | 0.531 | 0.67 | 0.016 |
| 6,4 | 0.003 | 2,78 | 0.08 | 0.923 | 0.965 | 0.002 |
| 6,6 | 0.042 | 2,75 | 0.76 | 0.47 | 0.775 | 0.02 |
| 7,5 | 0.01 | 2,75 | 0.18 | 0.833 | 0.381 | 0.005 |
| 7,6 | 0.011 | 2,67 | 0.12 | 0.884 | 0.476 | 0.004 |

**Table B6**

*fNIRS ANOVA Results for the Stop-Signal Task (DeoxyHb; 0–25 s HRF Extraction Window)*

| Channel | SS | df | F | p | Levene's Sig | ηp² |
| --- | --- | --- | --- | --- | --- | --- |
| 1,1 | 0.00 | 2,78 | 0.02 | 0.979 | 0.959 | 0.001 |
| 1,2 | 0.00 | 2,77 | 0.07 | 0.930 | 0.261 | 0.002 |
| 1,4 | 0.00 | 2,75 | 0.53 | 0.589 | 0.477 | 0.014 |
| 2,2 | 0.00 | 2,68 | 0.15 | 0.861 | 0.076 | 0.004 |
| 2,3 | 0.00 | 2,77 | 0.03 | 0.972 | 0.562 | 0.001 |
| 2,5 | 0.00 | 2,68 | 0.1 | 0.902 | 0.093 | 0.003 |
| 3,1 | 0.02 | 2,77 | 1.11 | 0.334 | 0.509 | 0.028 |
| 3,4 | 0.01 | 2,77 | 0.61 | 0.544 | 0.509 | 0.016 |
| 4,2 | 0.00 | 2,74 | 0.17 | 0.847 | 0.559 | 0.004 |
| 4,4 | 0.00 | 2,77 | 0.59 | 0.557 | 0.995 | 0.015 |
| 4,5 | 0.01 | 2,77 | 1.39 | 0.256 | 0.136 | 0.035 |
| 4,6 | 0.01 | 2,74 | 1.11 | 0.334 | 0.288 | 0.029 |
| 5,3 | 0.01 | 2,74 | 0.36 | 0.699 | 0.201 | 0.010 |
| 5,5 | 0.00 | 2,77 | 0.12 | 0.890 | 0.422 | 0.003 |
| 6,4 | 0.00 | 2,78 | 0.03 | 0.972 | 0.695 | 0.001 |
| 6,6 | 0.02 | 2,75 | 2.94 | 0.059 | 0.335 | 0.073 |
| 7,5 | 0.00 | 2,75 | 0.63 | 0.536 | 0.607 | 0.016 |
| 7,6 | 0.02 | 2,67 | 1.24 | 0.296 | 0.285 | 0.036 |

**Blocks 1-5**

**Table B7**

*fNIRS ANOVA Results for the Stop-Signal Task – Blocks 1–5 (OxyHb; 5–20 s HRF Extraction Window)*

| Channel | SS | df | F | p | Levene's Sig | ηp² |
| --- | --- | --- | --- | --- | --- | --- |
| 1,1 | 0.01 | 2,78 | 0.075 | 0.927 | 0.318 | 0.002 |
| 1,2 | 0.007 | 2,77 | 0.05 | 0.952 | 0.361 | 0.001 |
| 1,4 | 0.078 | 2,76 | 0.512 | 0.602 | 0.288 | 0.013 |
| 2,2 | 0.071 | 2,72 | 0.183 | 0.834 | 0.245 | 0.005 |
| 2,3 | 0.128 | 2,77 | 0.685 | 0.507 | 0.503 | 0.017 |
| 2,5 | 0.263 | 2,71 | 1.801 | 0.173 | 0.103 | 0.048 |
| 3,1 | 0.113 | 2,76 | 0.611 | 0.545 | 0.743 | 0.016 |
| 3,4 | 0.052 | 2,76 | 0.384 | 0.683 | 0.646 | 0.01 |
| 4,2 | 0.026 | 2,74 | 0.217 | 0.805 | 0.182 | 0.006 |
| 4,4 | 0.096 | 2,77 | 0.727 | 0.487 | 0.262 | 0.019 |
| 4,5 | 0.011 | 2,77 | 0.118 | 0.889 | 0.53 | 0.003 |
| 4,6 | 0.003 | 2,75 | 0.018 | 0.982 | 0.755 | 0 |
| 5,3 | 0.139 | 2,76 | 0.967 | 0.385 | 0.109 | 0.025 |
| 5,5 | 0.186 | 2,77 | 1.14 | 0.325 | 0.913 | 0.029 |
| 6,4 | 0.037 | 2,78 | 0.491 | 0.614 | 0.376 | 0.012 |
| 6,6 | 0.171 | 2,75 | 1.697 | 0.19 | 0.394 | 0.043 |
| 7,5 | 0.014 | 2,76 | 0.171 | 0.843 | 0.194 | 0.004 |
| 7,6 | 0.13 | 2,69 | 0.784 | 0.461 | 0.494 | 0.022 |

**Table B8**

*fNIRS ANOVA Results for the Stop-Signal Task – Blocks 1–5 (DeoxyHb; 5–20 s HRF Extraction Window)*

| Channel | SS | df | F | p | Levene's Sig | ηp² |
| --- | --- | --- | --- | --- | --- | --- |
| 1,1 | 0.002 | 2,78 | 0.064 | 0.938 | 0.374 | 0.002 |
| 1,2 | 0.003 | 2,77 | 0.336 | 0.716 | 0.964 | 0.009 |
| 1,4 | 0.003 | 2,76 | 0.336 | 0.715 | 0.387 | 0.009 |
| 2,2 | 0.001 | 2,72 | 0.026 | 0.975 | 0.124 | 0.001 |
| 2,3 | 0.006 | 2,77 | 0.232 | 0.794 | 0.255 | 0.006 |
| 2,5 | 0.021 | 2,71 | 0.591 | 0.557 | 0.357 | 0.016 |
| 3,1 | 0.072 | 2,76 | 1.651 | 0.199 | 0.428 | 0.042 |
| 3,4 | 0.012 | 2,76 | 0.367 | 0.694 | 0.247 | 0.01 |
| 4,2 | 0.014 | 2,74 | 0.767 | 0.468 | 0.465 | 0.02 |
| 4,4 | 0.055 | 2,77 | 1.226 | 0.299 | 0.325 | 0.031 |
| 4,5 | 0.004 | 2,77 | 0.244 | 0.784 | 0.330 | 0.006 |
| 4,6 | 0.041 | 2,75 | 1.18 | 0.313 | 0.450 | 0.031 |
| 5,3 | 0.023 | 2,76 | 0.652 | 0.524 | 0.077 | 0.017 |
| 5,5 | 0.017 | 2,77 | 0.464 | 0.63 | 0.391 | 0.012 |
| 6,4 | 0.001 | 2,78 | 0.128 | 0.88 | 0.840 | 0.003 |
| 6,6 | 0.042 | 2,75 | 2.956 | 0.058 | 0.229 | 0.073 |
| 7,5 | 0.001 | 2,76 | 0.088 | 0.916 | 0.485 | 0.002 |
| 7,6 | 0.035 | 2,69 | 1.127 | 0.33 | 0.068 | 0.032 |

**Behavioural Outcome (SSRT) – First five blocks**

A one-way ANOVA was conducted to examine the effect of group on SSRT over the first five blocks. There was no statistically significant difference between groups, F(2, 78) = 1.80, p = .172, ηp²= .044. Levene’s test indicated that the assumption of homogeneity of variances was met, *F*(2, 78) = 1.40, *p* = .254.

**Exploratory Regression Analyses**

**Behavioural (SSRT)**

A hierarchical multiple regression was conducted to predict stop-signal reaction time (SSRT). The overall model was not significant, *R²* = .17, *F*(6, 40) = 1.34, *p* = .261. Neither the covariates (age, sex, AUDIT-C) nor cannabis-related predictors (CUDIT-R, age of onset, lifetime dose) were significant. Variance inflation factors (VIFs) indicated no multicollinearity (all VIFs < 1.25).

**Table B9**

*Hierarchical Regression Model Predicting SSRT*

| Variable | Cumulative | | |  | Simultaneous | | |
| --- | --- | --- | --- | --- | --- | --- | --- |
|  | R2-change | F-change (df) | p |  | β | p |
| *Step one* | .07 | .54 (3,43) | .374 |  |  |  |
| Age |  |  |  |  | -.14 | .180 |
| Sex |  |  |  |  | .25 | .042 |
| AUDIT C |  |  |  |  | -.04 | .397 |
| *Step two* | .10 | .98 (3,40) | .210 |  |  |  |
| CUDIT-R Score |  |  |  |  | .21 | .174 |
| Age of Onset |  |  |  |  | -.05 | .779 |
| Total Lifetime Dose (SJUs) |  |  |  |  | -.09 | .592 |

**fNIRS regressions**

Across all 36 regression models (18 oxyHb, 18 deoxyHb), no overall model was statistically significant at the corrected threshold (*p* > .01), and no individual predictors reached significance. All models explained less than 19% of the variance (adjusted R² < .19), representing a universal weak model fit. Variance inflation factors (VIFs) indicated no multicollinearity in any of the models (all VIFs < 1.25).

To check the robustness of these results across different mean HRF extraction time windows the same analysis was conducted for 0-20s and 0-25s. No significant effects were found (all *p*-values for overall model > .01; all adjusted R² < 0.19).

**Block Time Trend Analyses**

Analyses were conducted to determine whether there was a slowing effect over the task duration and whether this was specific to one group.

A linear regression revealed that block number significantly predicted block time, *b* = 0.15, 95% CI [0.07, 0.22], *SE* = 0.04, *t* (799) = 3.75, *p* < .001. On average, block times increased by approximately 0.15 seconds with each additional block.

A linear regression revealed a significant increase in go trial RT across blocks, b = 9.78, SE = 1.98, p < .001, 95% CI [5.90, 13.67], indicating that go trial RT increased by approximately 9.78 ms with each additional block. To check whether these results could be attributed to the frequency of stop trials, a further regression examined whether stop trial proportion was associated with slower RTs. The effect was not significant, indicating that slowing occurred independently of stop trial proportion *b* = 100.54, SE = 61.91, *p* = .105, 95% CI [–20.98, 222.06].

Additionally, a paired samples t-test was conducted to compare the mean time in seconds between the first and final blocks. Results revealed a significant increase in overall block times from Block 1 (M = 27.31, SD = 3.06) to Block 10 (M = 28.87, SD = 3.67), with a mean increase of 1.56 seconds, t(80) = −3.72, p < .001, d = −0.41, 95% CI [−2.40, −0.73].

One-way ANOVAs between groups showed no significant differences in the block time slopes *F*(2, 78) = .82, *p* = .402 or mean difference between first and last block times *F*(2, 78) = 1.37, *p* = .262, indicating that the trend of slowing over blocks was universal. This overall trend is illustrated in Figure B1, which shows the average block times across all participants from Block 1 to Block 10.


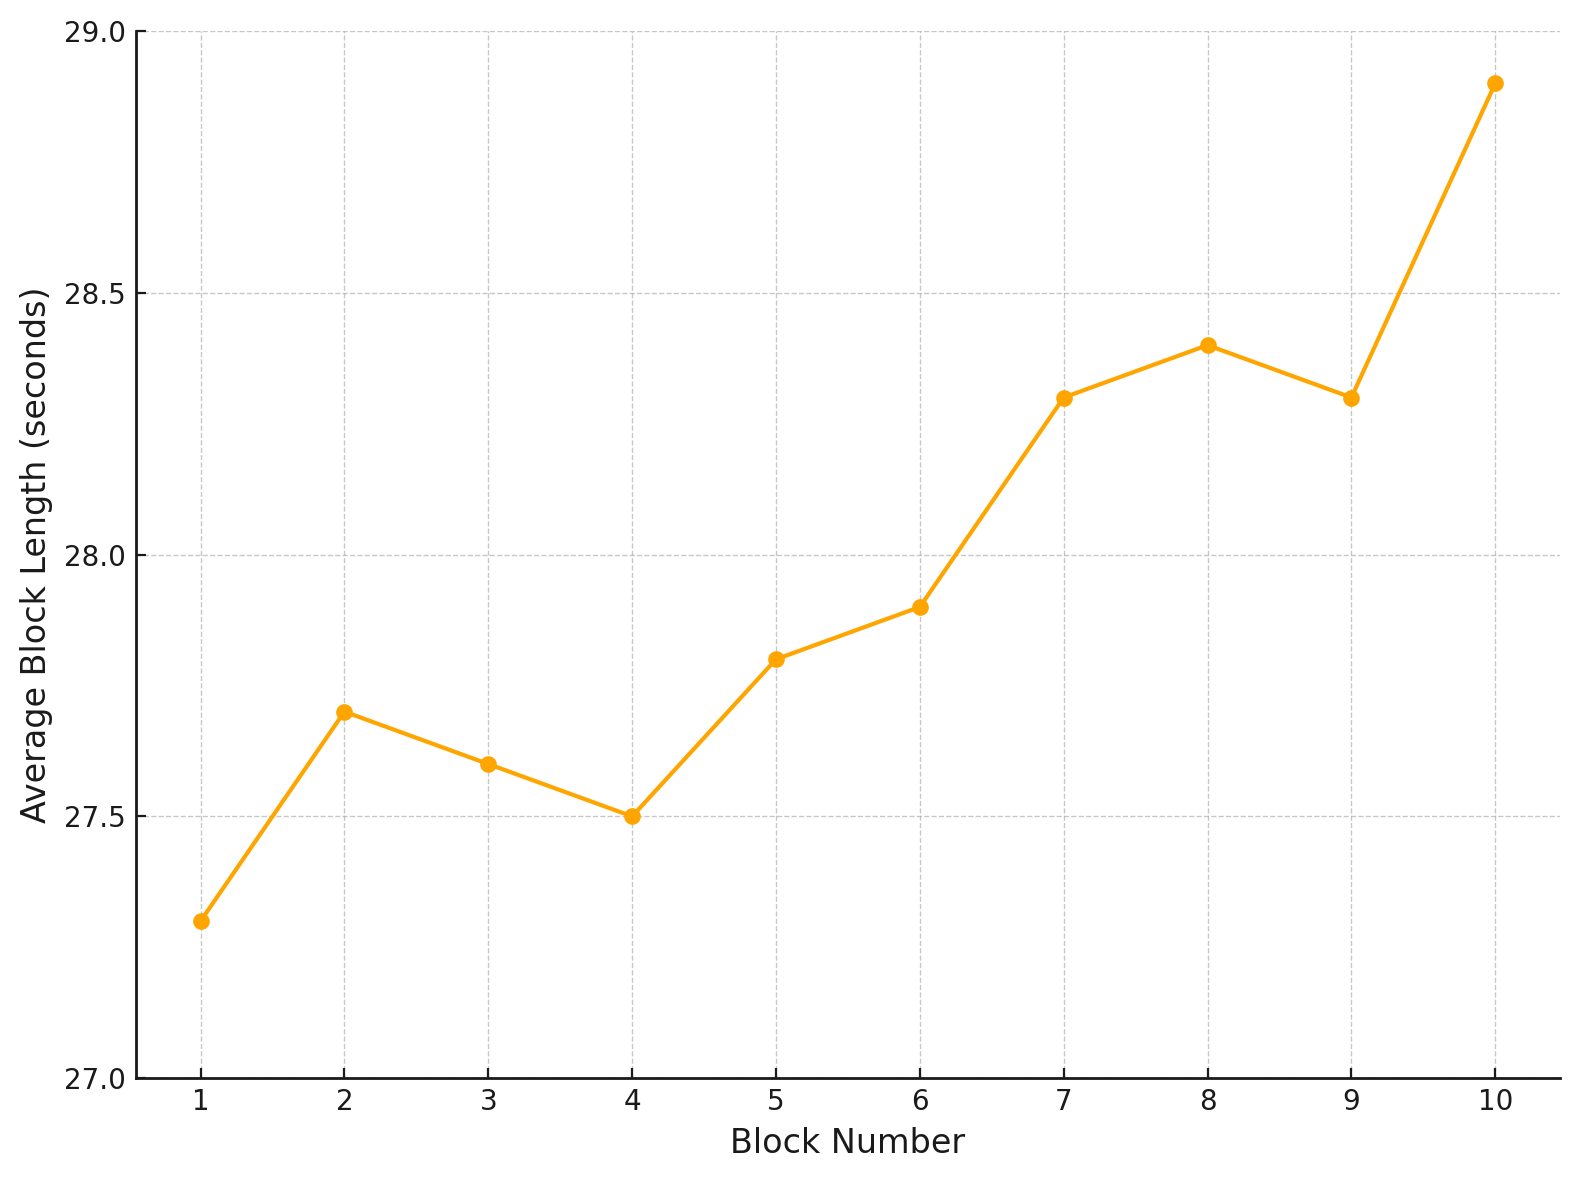


**Figure B1**

*Average Block Times Across Participants for Blocks 1-10*

**Supplementary ANOVAs on the First Half of the Task**

Given the significant increase in block times, both behavioural and fNIRS data from the first half of the task (Blocks 1-5) were selected for further analysis using the HRF extraction window of 5-20 seconds. This decision was based on the potentially confounding effect of universal disengagement and fatigue, which could obscure meaningful outcomes over the entire task epoch. No significant differences were found for SSRT or HRF mean between groups on any of the ANOVAs (all *ps* > .05).

**Appendix C** – **Substance Use Tables**

**Table C1**

*Descriptive Statistics for Abstinence and Dose on Last Use by Substance and Group*

| **Substance** | **Group** | **N** | **Mean Abstinence (Days)** | **SD (Days)** | **Range** | **Mean Dose** | **SD (Dose)** | **Unit** |
| --- | --- | --- | --- | --- | --- | --- | --- | --- |
| Alcohol | Control | 21 | 3.76 | 1.81 | 1–6 | 8.18 | 6.56 | UK units |
|  | Low CUDIT-R | 19 | 2.58 | 1.87 | 1–7 | 7.07 | 6.13 | UK units |
|  | High CUDIT-R | 25 | 2.84 | 2.15 | 1–10 | 11.91 | 7.57 | UK units |
| Cannabis | Low CUDIT-R | 13 | 2.62 | 1.98 | 1–7 | 0.75 | 0.31 | SJUs |
|  | High CUDIT-R | 28 | 1.75 | 1.60 | 1–7 | 1.89 | 1.39 | SJUs |
| Cocaine | Low CUDIT-R | 1 | 2.00 | — | 2–2 | 0.50 | — | grams |
|  | High CUDIT-R | 4 | 6.50 | 3.00 | 3–9 | 0.43 | 0.17 | grams |
| Other | High CUDIT-R | 4 | 6.50 | 3.51 | 3–10 | — | — | — |

**Table C2**

*Self-Reported Substance Use in the Past 30 Days by Group*

| **Substance** | **Group (Cannabis user)** | **N** | **Mean** | **SD** | **Range** | **Unit** |
| --- | --- | --- | --- | --- | --- | --- |
| Cannabis | Low CUDIT-R | 21 | 4.41 | 3.40 | 1–12 | SJU |
|  | High CUDIT-R | 30 | 18.60 | 8.53 | 1–30 | SJU |
| Cocaine | Low CUDIT-R | 1 | 4.00 | — | — | Grams |
|  | High CUDIT-R | 6 | 0.69 | 0.34 | 0.20–1.00 | Grams |
| MDMA | Low CUDIT-R | 1 | 1.00 | — | — | Milligrams |
|  | High CUDIT-R | 1 | 75.00 | — | — | Milligrams |
| Ketamine | Low CUDIT-R | — | — | — | — | Grams |
|  | High CUDIT-R | 2 | 2.25 | 1.77 | 1.0–3.5 | Grams |
| LSD | Low CUDIT-R | — | — | — | — | Micrograms |
|  | High CUDIT-R | 1 | 2.00 | — | — | Micrograms |

*Note.* Non-user control participants reported no cannabis or other illicit substance use in the past 30 days, and are therefore omitted from the table. Values reflect self-reported quantity consumed over the 30 days preceding testing. Units were standardised per substance.

**Table C3**

*Self-reported frequency of substance use within the past 3 months, by group*

| Substance | Group | Never Used | Used Previously* | <Monthly | Monthly | Weekly | Daily | Total N |
| --- | --- | --- | --- | --- | --- | --- | --- | --- |
| Alcohol | Control | 4 | 0 | 6 | 5 | 15 | 0 | 30 |
|  | Low CUDIT | 0 | 0 | 0 | 5 | 16 | 0 | 21 |
|  | High CUDIT | 0 | 2 | 0 | 7 | 19 | 2 | 30 |
| Amphetamine | Control | 30 | 0 | 0 | 0 | 0 | 0 | 30 |
|  | Low CUDIT | 19 | 2 | 0 | 0 | 0 | 0 | 21 |
|  | High CUDIT | 26 | 3 | 1 | 0 | 0 | 0 | 30 |
| Cocaine | Control | 28 | 1 | 1 | 0 | 0 | 0 | 30 |
|  | Low CUDIT | 11 | 4 | 4 | 2 | 0 | 0 | 21 |
|  | High CUDIT | 7 | 8 | 11 | 3 | 1 | 0 | 30 |
| Ecstasy (MDMA) | Control | 30 | 0 | 0 | 0 | 0 | 0 | 30 |
|  | Low CUDIT | 12 | 6 | 2 | 1 | 0 | 0 | 21 |
|  | High CUDIT | 10 | 14 | 3 | 2 | 0 | 0 | 29 |
| Ketamine | Control | 29 | 0 | 1 | 0 | 0 | 0 | 30 |
|  | Low CUDIT | 15 | 4 | 1 | 1 | 0 | 0 | 21 |
|  | High CUDIT | 9 | 12 | 6 | 2 | 1 | 0 | 30 |
| LSD | Control | 30 | 0 | 0 | 0 | 0 | 0 | 30 |
|  | Low CUDIT | 14 | 7 | 0 | 0 | 0 | 0 | 21 |
|  | High CUDIT | 19 | 8 | 2 | 1 | 0 | 0 | 30 |
| Mushrooms | Control | 30 | 0 | 0 | 0 | 0 | 0 | 30 |
|  | Low CUDIT | 13 | 4 | 4 | 0 | 0 | 0 | 21 |
|  | High CUDIT | 11 | 9 | 8 | 2 | 0 | 0 | 30 |
| Poppers | Control | 29 | 0 | 1 | 0 | 0 | 0 | 30 |
|  | Low CUDIT | 13 | 4 | 3 | 1 | 0 | 0 | 21 |
|  | High CUDIT | 19 | 6 | 1 | 4 | 0 | 0 | 30 |
| Tobacco | | Control | 23 | 0 | 2 | 2 | 1 | 2 | 30 |
|  | | Low CUDIT | 5 | 1 | 2 | 5 | 4 | 4 | 21 |
|  | | High CUDIT | 1 | 4 | 3 | 0 | 7 | 15 | 30 |

*Note:* ‘Used Previously’ = used at some point in lifetime but not in the past 3 months.
